# Supplementary material for: Self-optimising continuous-flow hydrothermal reactor for nanoparticle synthesis
Source: Royal Society of Chemistry journal article supplement (doi:10.1039/d4re00339j), 2025-01-01
Supplement: d4re00339j1.pdf [file d4re00339j1.pdf]

## Supporting Information for **Self-Optimising Continuous-Flow Hydrothermal Reactor for Nanoparticle Synthesis**

**Cameron Jackson<sup>a</sup>, Karen Robertson<sup>a</sup>, Vitaliy Sechenyh<sup>a</sup>, Thomas W. Chamberlain<sup>b</sup>, Richard A. Bourne<sup>c</sup>, Edward Lester<sup>a</sup>**

*a. Advanced Materials Research Group, Faculty of Engineering, University of Nottingham, Nottingham NG7 2RD, United Kingdom.*

*b. Institute of Process Research and Development, School of Chemistry, School of Chemical and Process Engineering, University of Leeds, Leeds, United Kingdom*

*c. School of Chemical and Process Engineering, University of Leeds, Leeds LS2 9JT, United Kingdom*

### Table of Contents

- 1. Design of experiment study**
- 2. Self-optimised experiments**
- 3. Optimisation algorithm**
- 4. DLS size distribution analysis**
- 5. Validation of results using TEM, UV-vis and XRD techniques**
- 6. References**

## 1. Design of experiment (DoE) study

Table 1. Results of the DoE study

| Exp. code | Temperature [°C] | Total flowrate [ml·min <sup>-1</sup> ] | Flow Ratio | Hydrodynamic diameter [nm] | PDI  |
|-----------|------------------|----------------------------------------|------------|----------------------------|------|
| 1         | 340              | 30                                     | 0.330      | 43.3                       | 0.25 |
| 2         | 360              | 30                                     | 0.330      | 56.3                       | 0.21 |
| 3         | 380              | 30                                     | 0.330      | 83.7                       | 0.10 |
| 4         | 340              | 35                                     | 0.330      | 45.3                       | 0.55 |
| 5         | 360              | 35                                     | 0.330      | 34.6                       | 0.49 |
| 6         | 380              | 35                                     | 0.330      | 73.8                       | 0.25 |
| 7         | 340              | 25                                     | 0.330      | 41.3                       | 0.23 |
| 8         | 360              | 25                                     | 0.330      | 56.9                       | 0.21 |
| 9         | 380              | 25                                     | 0.330      | 90.2                       | 0.11 |
| 10        | 340              | 30                                     | 0.415      | 42.9                       | 0.53 |
| 11        | 360              | 30                                     | 0.415      | 38.6                       | 0.31 |
| 12        | 380              | 30                                     | 0.415      | 71.7                       | 0.22 |
| 13        | 340              | 35                                     | 0.415      | 43.0                       | 0.52 |
| 14        | 360              | 35                                     | 0.415      | 43.1                       | 0.21 |
| 15        | 380              | 35                                     | 0.415      | 88.5                       | 0.25 |
| 16        | 340              | 25                                     | 0.415      | 62.1                       | 0.62 |
| 17        | 360              | 25                                     | 0.415      | 36.7                       | 0.41 |
| 18        | 380              | 25                                     | 0.415      | 70.7                       | 0.23 |
| 19        | 340              | 30                                     | 0.500      | 101.7                      | 0.46 |
| 20        | 360              | 30                                     | 0.500      | 63.7                       | 0.60 |
| 21        | 380              | 30                                     | 0.500      | 49.4                       | 0.28 |
| 22        | 340              | 35                                     | 0.500      | 93.9                       | 0.50 |
| 23        | 360              | 35                                     | 0.500      | 51.2                       | 0.66 |
| 24        | 380              | 35                                     | 0.500      | 81.8                       | 0.30 |
| 25        | 340              | 25                                     | 0.500      | 87.6                       | 0.53 |
| 26        | 360              | 25                                     | 0.500      | 50.7                       | 0.59 |
| 27        | 380              | 25                                     | 0.500      | 56.9                       | 0.24 |
| 28        | 360              | 30                                     | 0.415      | 34.4                       | 0.30 |
| 29        | 360              | 35                                     | 0.415      | 33.8                       | 0.40 |
| 30        | 360              | 35                                     | 0.415      | 33.9                       | 0.39 |

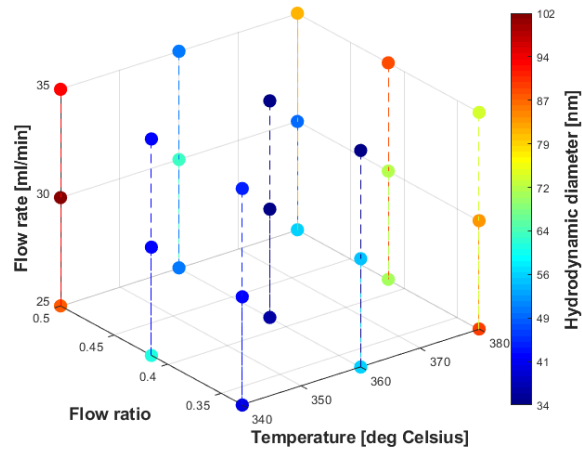

Figure 1. A plot showing outcomes of the DoE study. Each coloured point represents an individual experiment performed by the system.

## 2. Self-optimised experiments

Table 2. Results of self-optimised experiments using SNOBFIT optimisation algorithm

| Exp. code | Temperature [°C] | Total flowrate [ml·min <sup>-1</sup> ] | Flow Ratio | Hydrodynamic diameter [nm] | PDI  |
|-----------|------------------|----------------------------------------|------------|----------------------------|------|
| 1         | 372              | 27.2                                   | 0.361      | 62.1                       | 0.22 |
| 2         | 372              | 26.9                                   | 0.373      | 64.3                       | 0.21 |
| 3         | 360              | 30.0                                   | 0.330      | 56.3                       | 0.21 |
| 4         | 361              | 27.5                                   | 0.346      | 57.2                       | 0.23 |
| 5         | 380              | 26.3                                   | 0.347      | 75.9                       | 0.18 |
| 6         | 368              | 27.9                                   | 0.396      | 51.0                       | 0.23 |
| 7         | 364              | 26.7                                   | 0.330      | 68.8                       | 0.24 |
| 8         | 360              | 25.0                                   | 0.330      | 58.2                       | 0.20 |
| 9         | 380              | 29.2                                   | 0.330      | 83.7                       | 0.14 |
| 10        | 369              | 28.1                                   | 0.354      | 59.3                       | 0.22 |
| 11        | 366              | 27.7                                   | 0.347      | 57.6                       | 0.20 |
| 12        | 378              | 29.3                                   | 0.396      | 60.5                       | 0.20 |
| 13        | 380              | 26.0                                   | 0.330      | 81.9                       | 0.18 |
| 14        | 376              | 27.6                                   | 0.359      | 64.0                       | 0.21 |
| 15        | 368              | 32.1                                   | 0.377      | 44.6                       | 0.23 |
| 16        | 380              | 25.0                                   | 0.338      | 77.8                       | 0.16 |
| 17        | 374              | 31.5                                   | 0.383      | 51.9                       | 0.17 |
| 18        | 373              | 25.0                                   | 0.346      | 60.7                       | 0.17 |
| 19        | 380              | 25.0                                   | 0.330      | 91.1                       | 0.13 |
| 20        | 364              | 25.5                                   | 0.335      | 72.8                       | 0.25 |
| 21        | 380              | 27.7                                   | 0.358      | 76.0                       | 0.21 |
| 22        | 365              | 33.5                                   | 0.345      | 42.7                       | 0.31 |
| 23        | 378              | 28.4                                   | 0.330      | 75.8                       | 0.21 |
| 24        | 377              | 25.0                                   | 0.330      | 77.7                       | 0.23 |
| 25        | 376              | 26.9                                   | 0.343      | 73.9                       | 0.23 |
| 26        | 377              | 27.3                                   | 0.346      | 74.5                       | 0.22 |
| 27        | 380              | 28.2                                   | 0.354      | 74.5                       | 0.21 |
| 28        | 380              | 26.2                                   | 0.330      | 84.1                       | 0.17 |
| 29        | 380              | 29.3                                   | 0.330      | 78.7                       | 0.19 |
| 30        | 380              | 25.0                                   | 0.330      | 84.4                       | 0.18 |

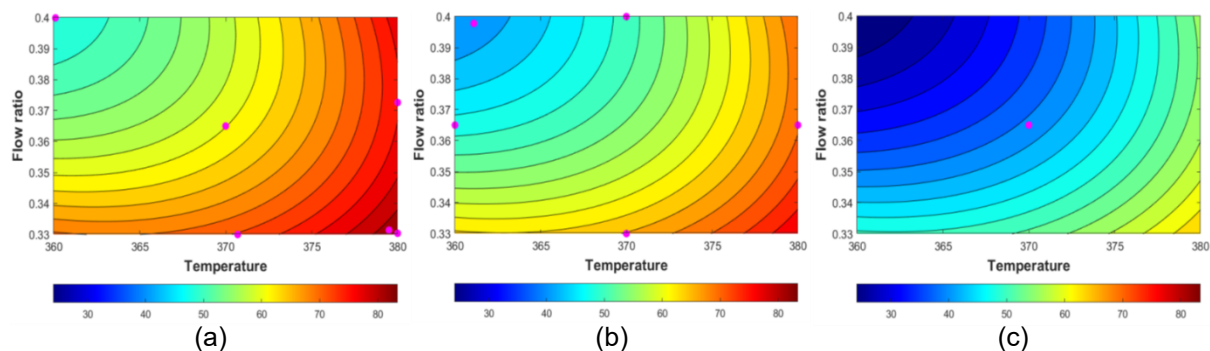

Figure 2. Contour plots of the polynomial regression model which was generated in self-optimised experiments using SNOBFIT algorithm. The pink dots show the position of individual experimental conditions. Plots correspond to following total flow rates: (a) – 25 ml·min<sup>-1</sup>; (b) – 30 ml·min<sup>-1</sup>; (c) – 35 ml·min<sup>-1</sup>

Table 3. Results of self-optimised experiments using Bayesian optimisation algorithm

| Exp. code | Temperature [°C] | Total flowrate [ml·min <sup>-1</sup> ] | Flow Ratio | Hydrodynamic diameter [nm] | PDI  |
|-----------|------------------|----------------------------------------|------------|----------------------------|------|
| 1         | 360              | 30.0                                   | 0.365      | 44.5                       | 0.24 |
| 2         | 370              | 25.0                                   | 0.365      | 62.5                       | 0.22 |
| 3         | 370              | 30.0                                   | 0.330      | 66.4                       | 0.21 |
| 4         | 370              | 30.0                                   | 0.400      | 49.1                       | 0.22 |
| 5         | 370              | 35.0                                   | 0.365      | 42.1                       | 0.32 |
| 6         | 380              | 30.0                                   | 0.365      | 69.8                       | 0.19 |
| 7         | 380              | 26.0                                   | 0.330      | 83.9                       | 0.13 |
| 8         | 370              | 26.8                                   | 0.356      | 58.7                       | 0.18 |
| 9         | 373              | 27.0                                   | 0.330      | 69.0                       | 0.22 |
| 10        | 373              | 31.4                                   | 0.382      | 53.3                       | 0.21 |
| 11        | 371              | 25.0                                   | 0.330      | 64.0                       | 0.21 |
| 12        | 368              | 28.1                                   | 0.356      | 54.5                       | 0.19 |
| 13        | 380              | 25.9                                   | 0.330      | 84.3                       | 0.18 |
| 14        | 380              | 25.0                                   | 0.331      | 83.3                       | 0.18 |
| 15        | 380              | 25.0                                   | 0.373      | 76.8                       | 0.19 |
| 16        | 364              | 25.5                                   | 0.333      | 72.1                       | 0.24 |
| 17        | 361              | 30.4                                   | 0.398      | 43.2                       | 0.39 |
| 18        | 378              | 26.3                                   | 0.330      | 77.9                       | 0.19 |
| 19        | 380              | 25.5                                   | 0.330      | 84.9                       | 0.16 |
| 20        | 380              | 32.1                                   | 0.399      | 64.4                       | 0.20 |
| 21        | 367              | 29.6                                   | 0.393      | 44.9                       | 0.22 |
| 22        | 380              | 27.4                                   | 0.369      | 76.0                       | 0.20 |
| 23        | 360              | 25.2                                   | 0.400      | 47.0                       | 0.41 |
| 24        | 361              | 26.9                                   | 0.330      | 68.7                       | 0.30 |
| 25        | 380              | 25.1                                   | 0.330      | 87.7                       | 0.18 |
| 26        | 365              | 28.2                                   | 0.383      | 54.8                       | 0.37 |
| 27        | 376              | 26.4                                   | 0.388      | 67.4                       | 0.24 |
| 28        | 367              | 28.3                                   | 0.374      | 54.8                       | 0.31 |
| 29        | 376              | 26.7                                   | 0.350      | 75.9                       | 0.22 |
| 30        | 366              | 30.9                                   | 0.358      | 49.6                       | 0.27 |

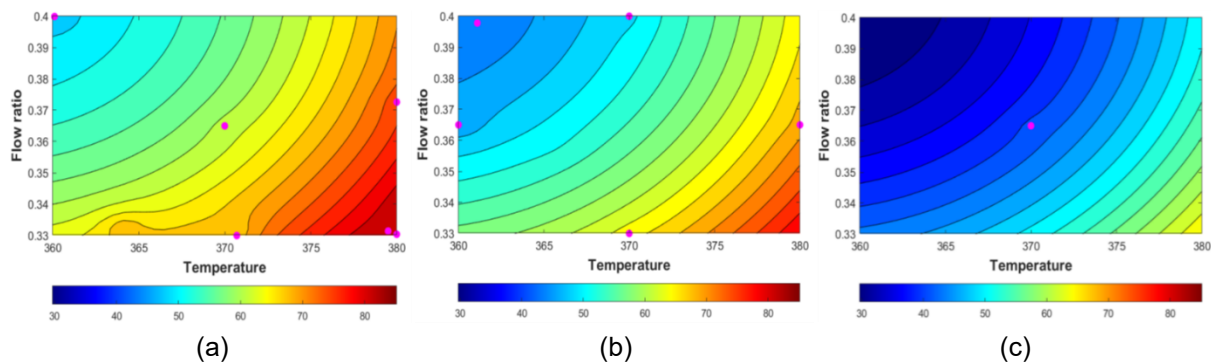

Figure 3. Contour plots of the Gaussian process regression model which was generated in self-optimised experiments using Bayesian optimisation algorithm. The pink dots show the position of individual experimental conditions. Plots correspond to following total flow rates: (a) –  $25 \text{ ml}\cdot\text{min}^{-1}$ ; (b) –  $30 \text{ ml}\cdot\text{min}^{-1}$ ; (c) –  $35 \text{ ml}\cdot\text{min}^{-1}$

### 3. Optimisation algorithm

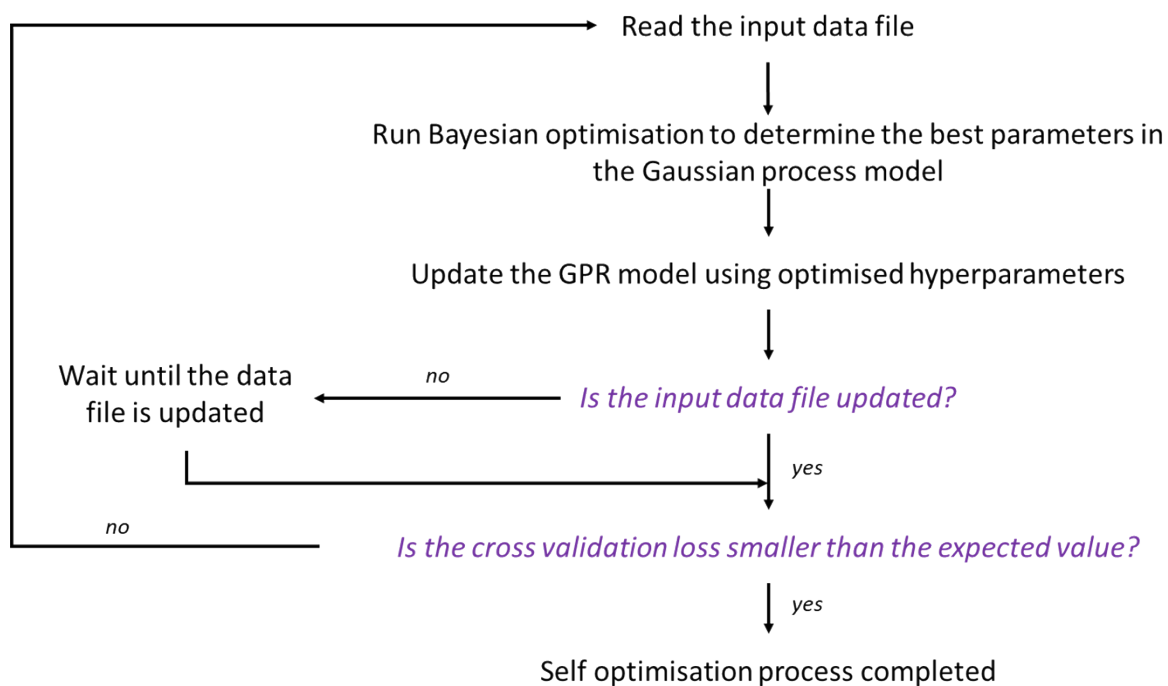

Figure 4. A simplified schematic of the algorithm used in self-optimised experiments.

#### 4. DLS size distribution analysis

Count Rate (kcps): 360.0                      Measurement Position (mm): 4.20  
 Cell Description: Quartz flow cell                      Attenuator: 6

|                                | Size (d.nm):         | % Intensity: | St Dev (d.nm): |
|--------------------------------|----------------------|--------------|----------------|
| <b>Z-Average (d.nm): 45.41</b> | <b>Peak 1:</b> 55.24 | 99.0         | 26.74          |
| <b>Pdl: 0.195</b>              | <b>Peak 2:</b> 4495  | 1.0          | 879.4          |
| <b>Intercept: 0.941</b>        | <b>Peak 3:</b> 0.000 | 0.0          | 0.000          |
| <b>Result quality : Good</b>   |                      |              |                |

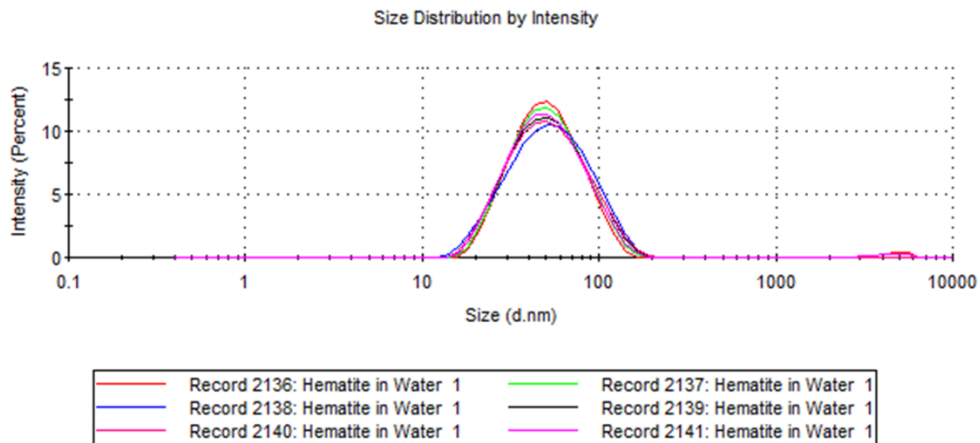

Figure 5. Results of the DLS analysis for Sample A. Plot includes information on the size distribution by intensity.

Count Rate (kcps): 420.8                      Measurement Position (mm): 4.20  
 Cell Description: Quartz flow cell                      Attenuator: 6

|                                | Size (d.nm):         | % Intensity: | St Dev (d.nm): |
|--------------------------------|----------------------|--------------|----------------|
| <b>Z-Average (d.nm): 54.08</b> | <b>Peak 1:</b> 73.67 | 100.0        | 45.47          |
| <b>Pdl: 0.225</b>              | <b>Peak 2:</b> 0.000 | 0.0          | 0.000          |
| <b>Intercept: 0.931</b>        | <b>Peak 3:</b> 0.000 | 0.0          | 0.000          |
| <b>Result quality : Good</b>   |                      |              |                |

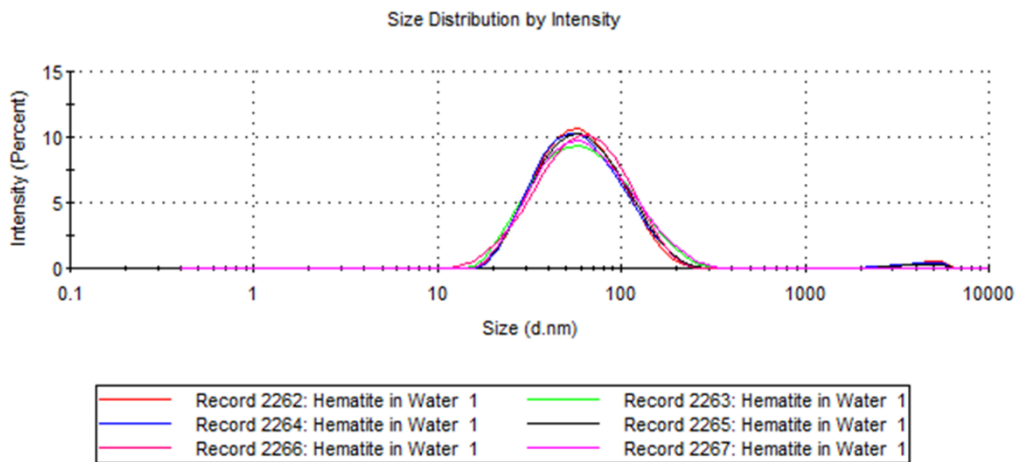

Figure 6. Results of the DLS analysis for Sample B. Plot includes information on the size distribution by intensity.

|                                           |                                        |                          |                             |
|-------------------------------------------|----------------------------------------|--------------------------|-----------------------------|
| <b>Count Rate (kcps):</b> 301.4           | <b>Measurement Position (mm):</b> 4.20 |                          |                             |
| <b>Cell Description:</b> Quartz flow cell | <b>Attenuator:</b> 5                   |                          |                             |
| <b>Z-Average (d.nm):</b> 66.95            | <b>Peak 1:</b> 84.48                   | <b>% Intensity:</b> 96.3 | <b>St Dev (d.nm):</b> 49.79 |
| <b>Pdl:</b> 0.252                         | <b>Peak 2:</b> 3503                    | 3.7                      | 1234                        |
| <b>Intercept:</b> 0.934                   | <b>Peak 3:</b> 0.000                   | 0.0                      | 0.000                       |
| <b>Result quality :</b> Good              |                                        |                          |                             |

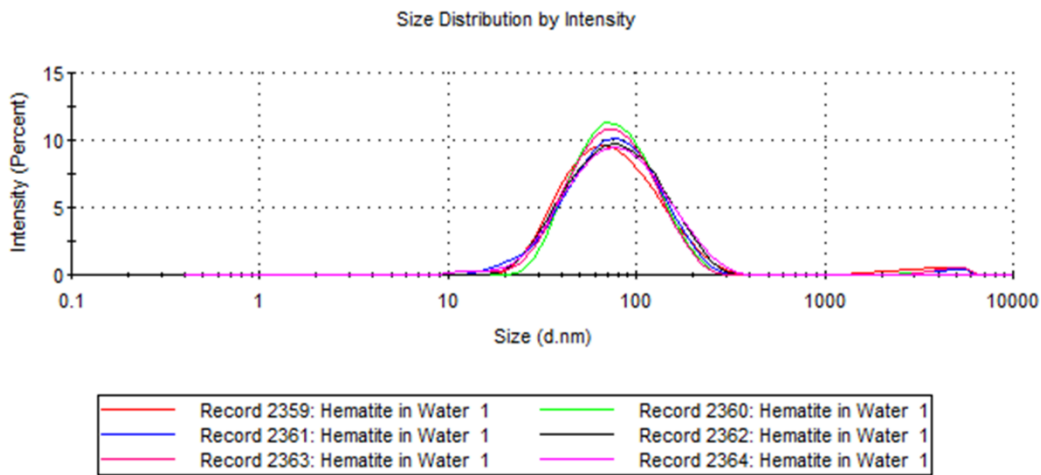

Figure 7. Results of the DLS analysis for Sample C. Plot includes information on the size distribution by intensity.

|                                           |                                        |                           |                             |
|-------------------------------------------|----------------------------------------|---------------------------|-----------------------------|
| <b>Count Rate (kcps):</b> 301.6           | <b>Measurement Position (mm):</b> 4.20 |                           |                             |
| <b>Cell Description:</b> Quartz flow cell | <b>Attenuator:</b> 4                   |                           |                             |
| <b>Z-Average (d.nm):</b> 76.17            | <b>Peak 1:</b> 96.81                   | <b>% Intensity:</b> 100.0 | <b>St Dev (d.nm):</b> 49.45 |
| <b>Pdl:</b> 0.214                         | <b>Peak 2:</b> 0.000                   | 0.0                       | 0.000                       |
| <b>Intercept:</b> 0.933                   | <b>Peak 3:</b> 0.000                   | 0.0                       | 0.000                       |
| <b>Result quality :</b> Good              |                                        |                           |                             |

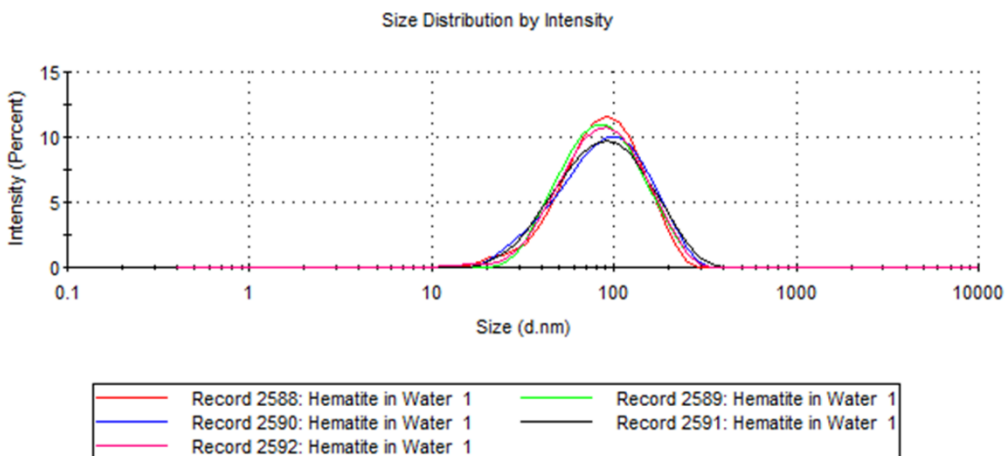

Figure 8. Results of the DLS analysis for Sample D. Plot includes information on the size distribution by intensity.

|                                    |                                 |
|------------------------------------|---------------------------------|
| Count Rate (kcps): 362.6           | Measurement Position (mm): 4.20 |
| Cell Description: Quartz flow cell | Attenuator: 4                   |

---

|                                | Size (d.nm):         | % Intensity: | St Dev (d.nm): |
|--------------------------------|----------------------|--------------|----------------|
| <b>Z-Average (d.nm): 84.05</b> | <b>Peak 1:</b> 96.26 | 100.0        | 34.12          |
| <b>Pdl: 0.131</b>              | <b>Peak 2:</b> 0.000 | 0.0          | 0.000          |
| <b>Intercept: 0.933</b>        | <b>Peak 3:</b> 0.000 | 0.0          | 0.000          |
| <b>Result quality : Good</b>   |                      |              |                |

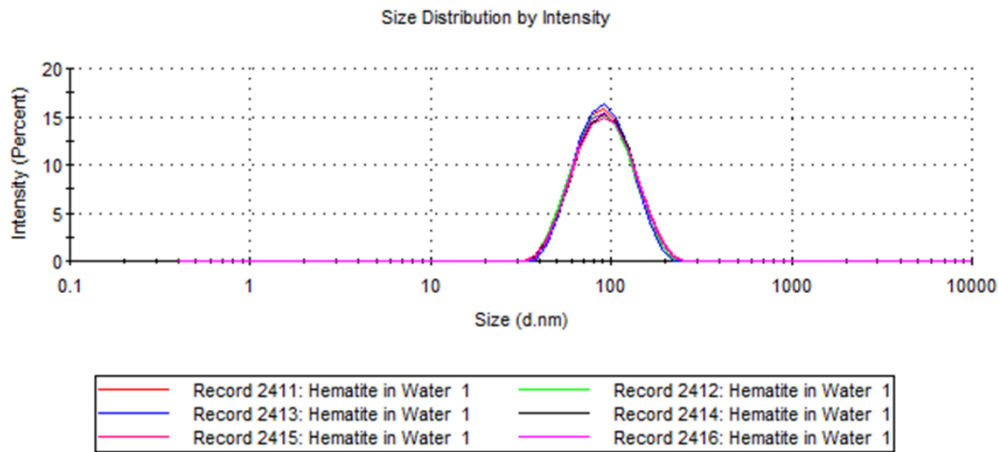

Figure 9. Results of the DLS analysis for Sample E. Plot includes information on the size distribution by intensity.

|                                    |                                 |
|------------------------------------|---------------------------------|
| Count Rate (kcps): 272.0           | Measurement Position (mm): 4.20 |
| Cell Description: Quartz flow cell | Attenuator: 4                   |

---

|                                | Size (d.nm):         | % Intensity: | St Dev (d.nm): |
|--------------------------------|----------------------|--------------|----------------|
| <b>Z-Average (d.nm): 91.71</b> | <b>Peak 1:</b> 105.9 | 100.0        | 41.25          |
| <b>Pdl: 0.122</b>              | <b>Peak 2:</b> 0.000 | 0.0          | 0.000          |
| <b>Intercept: 0.951</b>        | <b>Peak 3:</b> 0.000 | 0.0          | 0.000          |
| <b>Result quality : Good</b>   |                      |              |                |

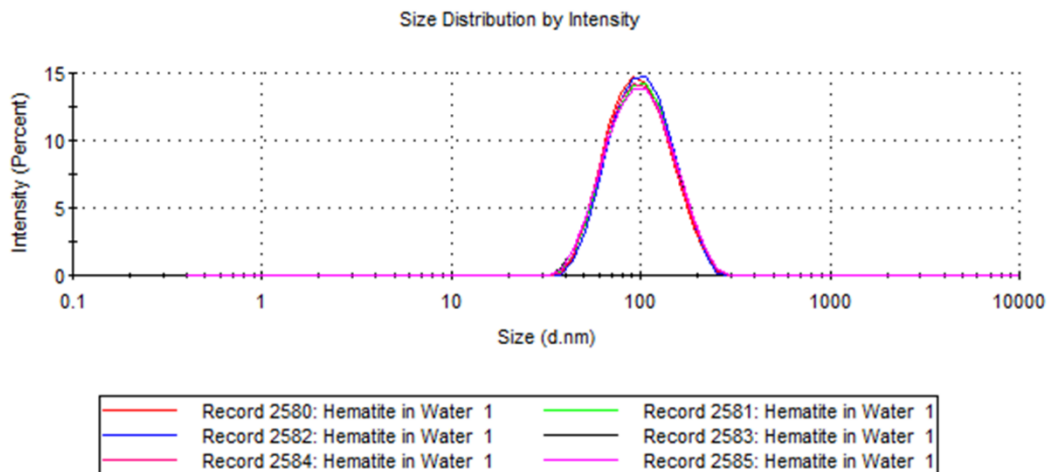



Figure 10. Results of the DLS analysis for Sample F. Plot includes information on the size distribution by intensity.

5. Validation of results using TEM, UV-vis and XRD techniques

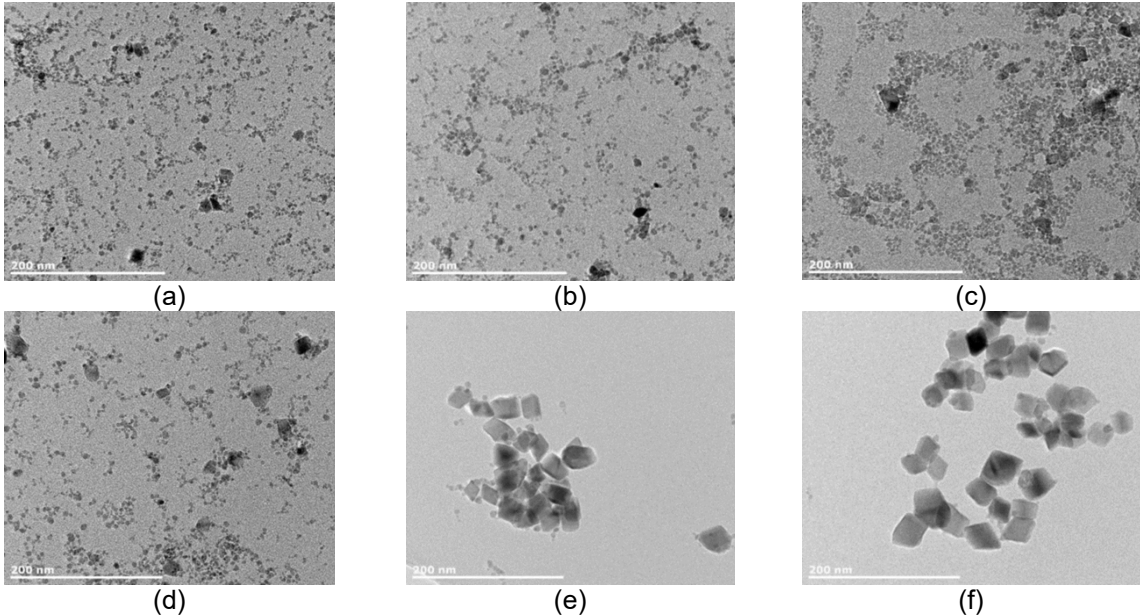

Figure 11. TEM images of following samples of nanoparticles: Sample A (a); Sample B (b); Sample C (c); Sample D (d); Sample E (e); Sample F (f).

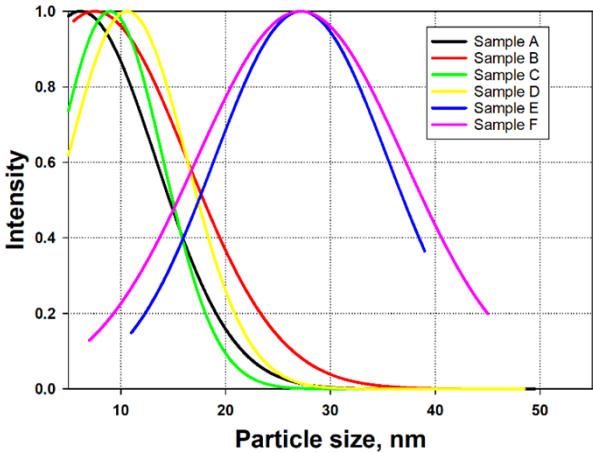

Figure 12. Comparison of particle size distributions obtained from TEM images of different samples

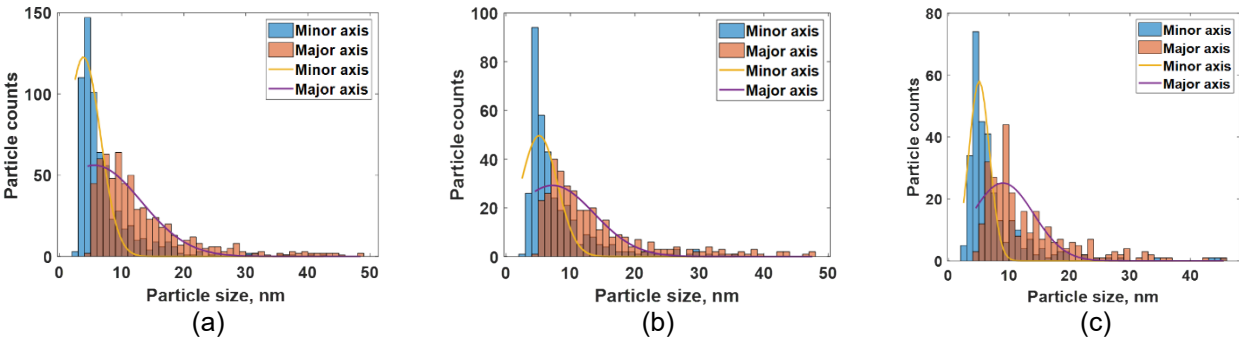

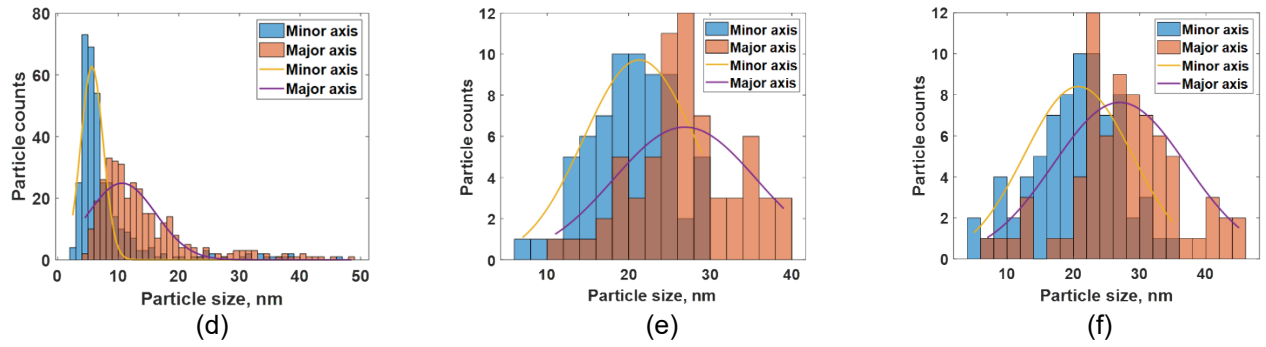

Figure 13. Particle size distributions for different samples of nanomaterials

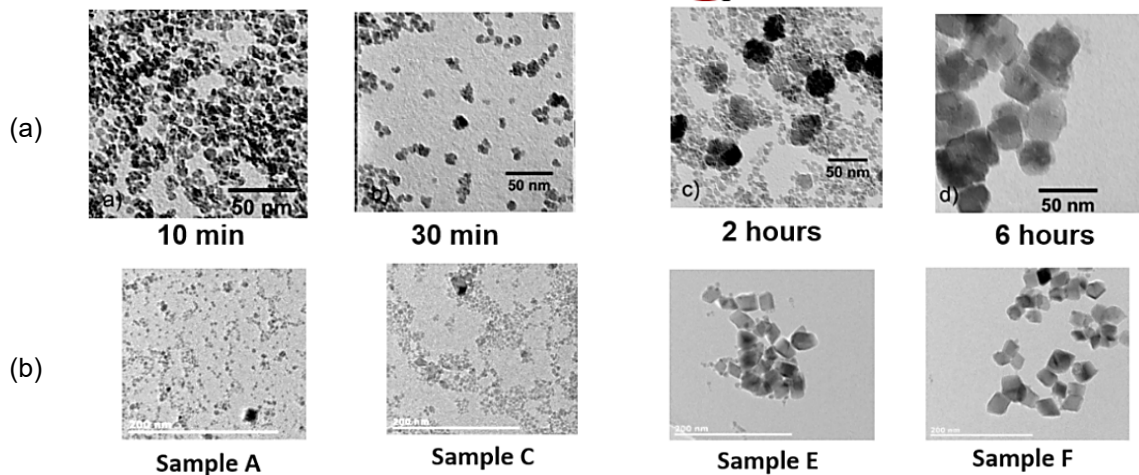

Figure 14. Comparison of TEM images obtained using two different types of nanomaterial synthesis: stirred tank reactor [1] (a); current study (b).

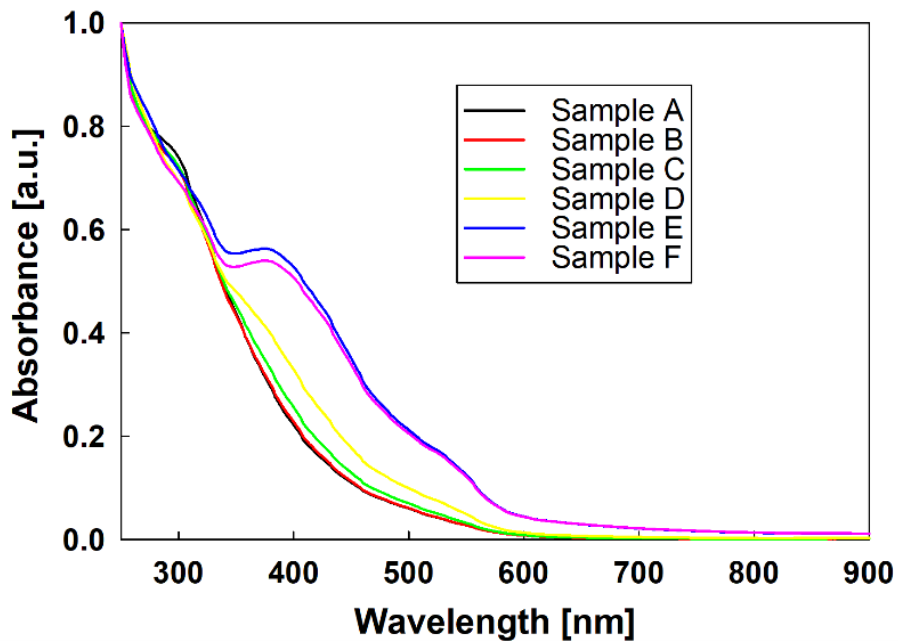

Figure 15. UV-Vis absorbance spectra of nanomaterial samples Cole-Parmer UV-Visible Spectrophotometer (WZ-83059-15) with a quartz cuvette of 10 mm path length. Analysis was in the wavelength range 250-900 nm, step size 2 nm.

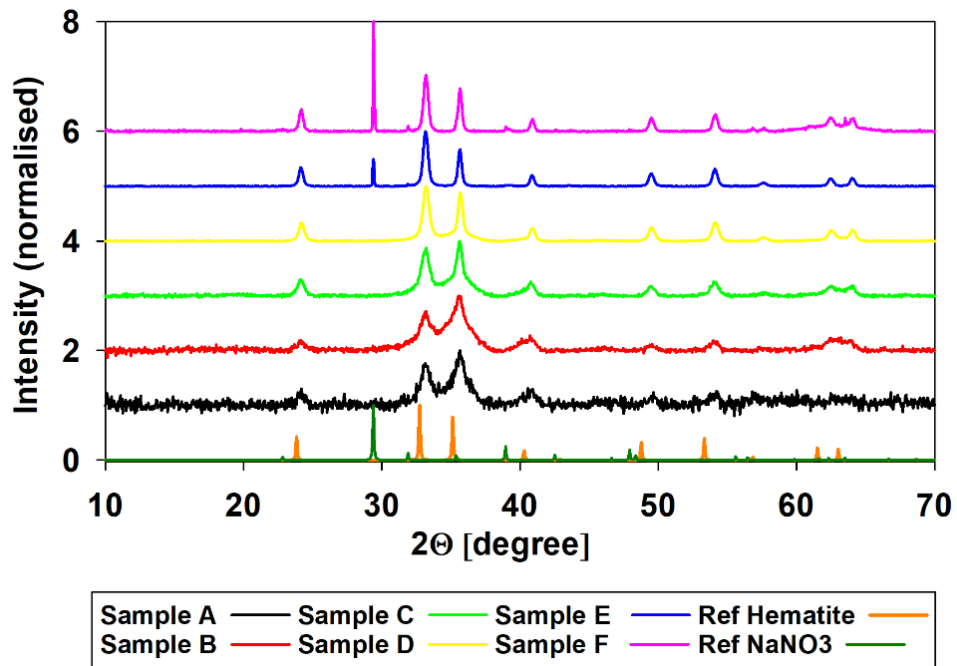

Figure 16. XRD spectra for different samples of nanomaterials Bruker D8-Advance Da Vinci Diffractometer with Cu K $\alpha$  radiation ( $\lambda = 1.5418 \text{ \AA}$ ). Diffraction patterns were recorded across a  $2\theta$  range of 5-70°, with a step size of 0.05° and 0.2 s per step

## 6. References

- 1 S. P. Schwaminger, R. Surya, S. Filser, A. Wimmer, F. Weigl, P. Fraga-García and S. Berensmeier, *Scientific Reports*, 2017, **7**, 12609.
